1 **Profiling pre-symptomatic and asymptomatic cases with confirmed SARS-CoV-2**  
2 **infection in Mexico City**

3 Omar Yaxmehen Bello-Chavolla MD, PhD<sup>1\*</sup>, Neftali Eduardo Antonio-Villa MD<sup>2</sup>, Arsenio  
4 Vargas-Vázquez<sup>2</sup>, Carlos A. Fermín-Martínez<sup>2</sup>, Alejandro Márquez-Salinas<sup>2</sup>, Jessica Paola  
5 Bahena-López MD<sup>2</sup>

6  
7 <sup>1</sup>Division of Research, Instituto Nacional de Geriátria. <sup>2</sup>MD/PhD (PECEM), Faculty of Medicine,  
8 National Autonomous University of Mexico.

9  
10 **Short title:** Asymptomatic SARS-CoV-2 in Mexico City

11  
12 **Corresponding author**

13 Omar Yaxmehen Bello-Chavolla. Division of Research. Instituto Nacional Geriátria. Anillo Perif.  
14 2767, San Jerónimo Lídice, La Magdalena Contreras, 10200, Mexico City, Mexico. Phone: +52  
15 (55) 5548486885. E-mail: [oyaxbell@yahoo.com.mx](mailto:oyaxbell@yahoo.com.mx)

16 **CONFLICT OF INTERESTS:** Nothing to disclose.

17 **FUNDING:** This research received no specific funding

18 **Word count:** 1,322 words; 2 Figures, 1 Table.

19 **ABSTRACT (250 WORDS)**

20 **BACKGROUND:** Asymptomatic SARS-CoV-2 infections are potential sources for  
21 transmission.

22 **OBJECTIVES:** Here, we aimed to profile pre-symptomatic/asymptomatic SARS-CoV-2  
23 infections in Mexico City, its associated comorbidities and outcomes.

24 **METHODS:** Prospective observational study of SARS-CoV-2 cases assessed by contact  
25 tracing within the National Epidemiological Surveillance System in Mexico City. We classified  
26 subjects as cases with and without respiratory and non-respiratory symptoms (RS, NRS,  
27 respectively) assessed for SARS-CoV-2 using real time RT-PCR from nasopharyngeal swabs  
28 to evaluate clinical characteristics as well as features associated with severe COVID-19.

29 **RESULTS:** Amongst 80735 cases with confirmed SARS-CoV-2 infection as of July 23<sup>th</sup>, 2020,  
30 we identified 9659 cases without RS (12.0%), 5605 had only NRS (6.9%) and 4054 who were  
31 initially asymptomatic (5.1%). Compared to asymptomatic cases, NRS cases and those with  
32 RS+NRS had higher rates of severe COVID-19 outcomes including hospitalization, ICU  
33 admission, and intubation ( $p < 0.001$ ). Mortality was higher for cases with RS+NRS (HR 7.58,  
34 95%CI 4.56-12.58) or NRS (HR 3.13, 95%CI 1.80-5.45) compared to asymptomatic cases,  
35 adjusted for age, sex and comorbidities. Predictors for mortality in asymptomatic SARS-Co-V-  
36 2 infections, chronic kidney disease, previous exposure with suspected infection cases and  
37 older age were predictors for lethality.

38 **CONCLUSIONS:** Definition of pre-symptomatic/asymptomatic cases has relevant implications  
39 for SARS-CoV-2 infection outcomes. Older age and comorbidity impact on the probability of  
40 developing severe complications for cases who were asymptomatic or had only NRS at  
41 evaluation and were sent for domiciliary treatment. Extending testing for detection of  
42 asymptomatic cases must be considered in Mexico to better understand the impact of the  
43 pandemic.

44 **Keywords:** SARS-CoV-2; Asymptomatic; Pre-symptomatic; Mexico; COVID-19 outcomes

## 45 INTRODUCTION

46 Asymptomatic infections are a potential source of rapid SARS-CoV-2 spread [1]. Prevalence  
47 of pre-symptomatic/asymptomatic cases varies widely but represent a larger proportion of  
48 cases than previously anticipated [2]. Controversies surrounding asymptomatic SARS-CoV-2  
49 infections have focused on the distinction between pre-symptomatic and asymptomatic  
50 infection and its definitions, which have focused on respiratory symptoms (RS), primarily cough,  
51 dyspnea and fever. Nevertheless, longitudinal data shows that only a fraction of initially  
52 asymptomatic infections develop subsequent symptoms [3–5]. In Mexico, SARS-CoV-2 testing  
53 focuses on sampling high-risk cases, which allowed characterization of increased susceptibility  
54 for severe COVID-19 attributable to cardio-metabolic comorbidities [6]; however, no data has  
55 been reported on asymptomatic SARS-CoV-2 infections. Lack of information regarding pre-  
56 symptomatic/asymptomatic cases in Mexico is concerning, particularly since many studies  
57 suggest that contact tracing of asymptomatic infections will be pivotal to contain further SARS-  
58 CoV-2 spread [7]. Here, we profile pre-symptomatic/asymptomatic cases of SARS-CoV-2  
59 infections to assess outcomes depending on its definitions using cases detected in Mexico City.

## 60 METHODS

61 We analyzed data from the National Epidemiological Surveillance System in the Greater  
62 Mexico City area, an open-source dataset comprising daily updated cases tested using real-  
63 time RT-PCR to confirm SARS-CoV-2 using nasopharyngeal swabs according to the Berlin  
64 Protocol [8]. RS included fever, dyspnea, cough, polypnea or cyanosis at initial evaluation,  
65 whilst non-RS (NRS) included headache, myalgias, arthralgias, general malaise, abdominal  
66 pain, chest pain, conjunctivitis, irritability or vomiting. We defined cases with RS+NRS with  $\geq 1$   
67 RS and any or none NRS. Cases with NRS had  $\geq 1$  NRS without RS, whilst asymptomatic cases  
68 had no symptoms. Pre-symptomatic cases were initially asymptomatic but eventually required  
69 hospital admission after follow-up. To contrast previous definitions of pre-  
70 symptomatic/asymptomatic cases based only on RS, we combined asymptomatic and NRS

71 cases and referred to them as cases without RS (WoRS); we confirmed these definitions using  
72 correspondence analyses to cluster symptoms with comparable similarity (**Supplementary**  
73 **Material**). NRS and asymptomatic cases were assessed outside the established framework for  
74 suspected COVID-19 cases in Mexico by convenience sampling and contact tracing. We also  
75 estimated 7-day rolling average positivity rates (PR) for RS+NRS, NRS and asymptomatic/pre-  
76 symptomatic cases. Follow-up was conducted for all non-hospitalized cases up to 14 days;  
77 outcomes for all patients included hospital discharge due to clinical improvement or voluntary,  
78 ambulatory/treatment follow-up or death. Severe COVID-19 was defined as a composite of  
79 death, ICU admission and intubation. Complete description of statistical analyses and available  
80 variables are detailed in **Supplementary Material**.

## 81 **RESULTS**

### 82 Study population

83 As of 23<sup>rd</sup> July 2020, a total of 212,708 subjects were tested for SARS-CoV-2 in Mexico City.  
84 From 80,735 cases with confirmed SARS-CoV-2 infection (Positivity rate 49.0%), 9,659 cases  
85 were WoRS (12.0%). Overall, 23,992 NRS cases had been evaluated, amongst whom 5,605  
86 had confirmed SARS-CoV-2 infection (Overall Positivity rate: 26.5%); similarly, 21,628 initially  
87 asymptomatic cases were evaluated and 4,054 cases had confirmed SARS-CoV-2 infection  
88 (Positivity rate: 21.4%). Notably, 7-day PRs had been steadily decreasing for all patient  
89 categories (**Supplementary Material**). NRS cases were younger, predominantly female and,  
90 interestingly, had lower prevalence of NRS compared to cases with RS+NRS. Initially  
91 asymptomatic cases were younger compared to RS+NRS cases, with similar trends for lower  
92 rates of comorbidities compared to both RS+NRS and NRS cases (**Figure 1, Table 1**).

### 93 Profiling NRS cases with SARS-CoV-2 infection

94 Amongst NRS cases (n=5,605), 283 subjects were hospitalized (5.0%), 26 required mechanical  
95 ventilatory support (MVS) (0.5%), 27 required intensive care unit (ICU) admission (0.5%).  
96 Overall, 96 patients died (1.7%), of whom 22 were ambulatory and 74 hospitalized. Predictors

97 increased risk for severe COVID-19 in NRS cases included vomiting, diabetes, and  
98 hypertension; decreased risk of severe COVID-19 was associated with rhinorrhea, previous  
99 exposure to suspected viral cases and healthcare workers. Independent predictors of mortality  
100 in NRS included older age, diabetes, chronic obstructive pulmonary disease (COPD), chronic  
101 kidney disease (CKD) and decreased risk associated with previous exposure to suspected viral  
102 cases (**Supplementary Material**). After follow-up, 481 patients were still under domiciliary  
103 surveillance, 109 remained hospitalized, 97 were discharged after recovery, 3 had voluntary  
104 discharge and 4,819 had completed follow-up with domiciliary surveillance without developing  
105 RS (86.0%).

#### 106 *Profiling pre-symptomatic/asymptomatic cases with SARS-CoV-2 infection*

107 Amongst initially asymptomatic patients (n=4,054), 139 were hospitalized (3.4%), 9 required  
108 MVS (0.2%) and 29 required ICU admission (0.7%). We recorded 24 deaths (0.6%) amongst  
109 whom 8 were ambulatory and 16 were hospitalized (**Table 1**). Predictors for severe COVID-19  
110 included younger age, cardiovascular disease, CKD, diabetes and a reduced risk associated  
111 to known previous exposure to suspected viral cases; predictors of lethality included older age  
112 and CKD. Currently, 444 patients were still under domiciliary surveillance, 84 remained  
113 hospitalized, 38 were discharged after recovery, 1 had a voluntary discharge, and 3,463 had  
114 completed follow-up without developing symptoms (85.4%).

#### 115 *Predictors and outcomes for RS+NRS, NRS and asymptomatic cases*

116 Compared to asymptomatic, NRS cases were associated with younger age, reduced previous  
117 viral exposure, healthcare workers, diabetes, obesity, female sex, hypertension and smoking.  
118 Similarly, compared to WoRS, RS+NRS cases were associated with asthma, COPD, older age,  
119 male sex, diabetes, obesity, hypertension, reduced previous viral exposure (**Figure 2**).  
120 Compared to pre-symptomatic/asymptomatic cases, risk of severe COVID-19 was not  
121 significantly higher for NRS, but it was for RS+NRS (HR 3.91, 95%CI 2.95-5.18), adjusted for  
122 age, sex and comorbidities. However, NRS and RS+NRS had higher mortality compared to

123 asymptomatic cases (Breslow-Cox  $p < 0.001$ , **Figure 2**); adjusting for age, sex and  
124 comorbidities, NRS (HR 2.32, 95%CI 1.48-3.63) or RS+NRS cases (HR 6.22, 95%CI 4.17-  
125 9.29) retained higher mortality compared to asymptomatic cases.

## 126 **DISCUSSION**

127 Here, we present a comprehensive report of pre-symptomatic/asymptomatic COVID-19 cases  
128 in Mexico City. We show that the definition of asymptomatic SARS-CoV-2 infection should be  
129 extended beyond RS to identify subjects at lowest risk of subsequent complications for  
130 domiciliary treatment who might contribute to further SARS-CoV-2 spread. We also report a  
131 low prevalence of pre-symptomatic cases amongst those who were initially classified as  
132 asymptomatic but eventually were hospitalized or had outcomes related to severe COVID-19  
133 [9]. This data confirms observations from other populations and highlights the relevance of  
134 identifying pre-symptomatic/asymptomatic cases, given conflicting evidence on viral shedding  
135 for pre-symptomatic/asymptomatic cases, and data suggesting evidence of subclinical lung  
136 abnormalities which must be assessed longitudinally to rule out long-term impacts of SARS-  
137 CoV-2 infection [10]. Notably, a consistent predictor of outcomes for NRS cases and pre-  
138 symptomatic/asymptomatic cases are previous exposure to suspected viral cases, highlighting  
139 the relevance of contact tracing and prompt case identification.

140 Studies assessing natural history of asymptomatic SARS-CoV-2 infections highlighted the role  
141 of age and comorbidity in the subsequent development of symptoms, which is consistent with  
142 our observations [11]. Domiciliary surveillance in Mexico City focused on outcomes but not  
143 individual symptom onset, which might limit our ability to identify all pre-symptomatic cases,  
144 particularly those who only develop mild symptoms. Regardless, only a small fraction of pre-  
145 symptomatic cases developed severe COVID-19 after being initially determined as  
146 asymptomatic, most of whom had underlying cardio-metabolic comorbidities or were  
147 susceptible for complications of COVID-19 attributable to unmasked cardiometabolic  
148 comorbidities. Asymptomatic SARS-CoV-2 infections have been postulated to elicit lower

149 immune responses and diminished antibody production compared to symptomatic cases.  
150 Severe COVID-19 in pre-symptomatic cases might be attributable to a combination of  
151 decreased early immune response to SARS-CoV-2 infection and late enhanced pro-  
152 inflammatory responses in subjects with comorbidities [10,12]. This might also extend to  
153 subjects with NRS with COVID-19 whom have previously been reported to delay seeking  
154 medical attention and have prolonged viral shedding compared with subjects with RS [13].  
155 Here, we assessed a thorough constellation of symptoms in one of the largest studies of pre-  
156 symptomatic/asymptomatic SARS-CoV-2 infections. Limitations include non-assessment of  
157 atypical SARS-CoV-2 symptoms which might occur amongst otherwise asymptomatic cases,  
158 particularly in older adults [14], and the lack of systematized sampling, which does not allow  
159 for an accurate estimation for the rates of asymptomatic cases in Mexico City. Our results  
160 highlight the need to systematize definition of asymptomatic cases and extend testing by  
161 contact tracing to detect asymptomatic SARS-CoV-2 infections as one of the mitigations  
162 strategies to reduce transmission of SARS-CoV-2 in Mexico City and Mexico in general [15].

163

## 164 **ACKNOWLEDGMENTS**

165 NEAV, JPBL, and AVV are enrolled at the PECEM program of the Faculty of Medicine at  
166 UNAM. JPBL and AVV are supported by CONACyT. The authors would like to acknowledge  
167 the invaluable work of all of Mexico's healthcare community in managing the COVID-19  
168 epidemic. Its participation in the COVID-19 surveillance program has made this work a reality,  
169 we are thankful for your effort.

## 170 **DATA AVAILABILITY**

171 All data sources and R code are available for reproducibility of results at  
172 [https://github.com/oyaxbell/covid\\_asymptomatic\\_cdmx](https://github.com/oyaxbell/covid_asymptomatic_cdmx).

## 173 **AUTHOR CONTRIBUTIONS**

174 Research idea and study design OYBC, NEAV, AVV, JPBL, CAFM, AMS; data acquisition:  
175 OYBC; data analysis/interpretation: OYBC, JPBL, NEAV, AVV, CAFM, AMS; statistical  
176 analysis: OYBC; manuscript drafting: OYBC, NEAV, AVV, JPBL, CAFM, AMS; supervision or  
177 mentorship: OYBC. Each author contributed important intellectual content during manuscript  
178 drafting or revision and accepts accountability for the overall work by ensuring that questions  
179 about the accuracy or integrity of any portion of the work are appropriately investigated and  
180 resolved.

181 **FUNDING:** No funding was received.

182 **CONFLICT OF INTEREST/FINANCIAL DISCLOSURE:** Nothing to disclose.

183



184 **REFERENCES**

- 185 1. Buitrago-Garcia DC, Egli-Gany D, Counotte MJ, Hossmann S, Imeri H, Salanti G, et al.  
186 The role of asymptomatic SARS-CoV-2 infections: rapid living systematic review and  
187 meta-analysis. medRxiv. 2020; doi:10.1101/2020.04.25.20079103
- 188 2. Oran DP, Topol EJ. Prevalence of Asymptomatic SARS-CoV-2 Infection: A Narrative  
189 Review. *Ann Intern Med.* 2020; doi:10.7326/M20-3012
- 190 3. Arons MM, Hatfield KM, Reddy SC, Kimball A, James A, Jacobs JR, et al.  
191 Presymptomatic SARS-CoV-2 Infections and Transmission in a Skilled Nursing Facility.  
192 *N Engl J Med.* 2020;382: 2081–2090. doi:10.1056/NEJMoa2008457
- 193 4. Sakurai A, Sasaki T, Kato S, Hayashi M, Tsuzuki S-I, Ishihara T, et al. Natural History of  
194 Asymptomatic SARS-CoV-2 Infection. *N Engl J Med.* 2020;  
195 doi:10.1056/NEJMc2013020
- 196 5. Imperial College COVID-19 Response Team, Lavezzo E, Franchin E, Ciavarella C,  
197 Cuomo-Dannenburg G, Barzon L, et al. Suppression of a SARS-CoV-2 outbreak in the  
198 Italian municipality of Vo. *Nature.* 2020; doi:10.1038/s41586-020-2488-1
- 199 6. Bello-Chavolla OY, Bahena-López JP, Antonio-Villa NE, Vargas-Vázquez A, González-  
200 Díaz A, Márquez-Salinas A, et al. Predicting mortality due to SARS-CoV-2: A  
201 mechanistic score relating obesity and diabetes to COVID-19 outcomes in Mexico. *J*  
202 *Clin Endocrinol Metab.* 2020; doi:10.1210/clinem/dgaa346
- 203 7. Huff HV, Singh A. Asymptomatic transmission during the COVID-19 pandemic and  
204 implications for public health strategies. *Clin Infect Dis.* 2020; doi:10.1093/cid/ciaa654
- 205 8. Covid-19 SINAVE Ciudad de México — Datos CDMX [Internet]. [cited 28 Jun 2020].  
206 Available: <https://datos.cdmx.gob.mx/explore/dataset/base-covid-sinave/table/>
- 207 9. Meng H, Xiong R, He R, Lin W, Hao B, Zhang L, et al. CT imaging and clinical course of  
208 asymptomatic cases with COVID-19 pneumonia at admission in Wuhan, China. *J Infect.*  
209 2020;81: e33–e39. doi:10.1016/j.jinf.2020.04.004

- 210 10. Long Q-X, Tang X-J, Shi Q-L, Li Q, Deng H-J, Yuan J, et al. Clinical and immunological  
211 assessment of asymptomatic SARS-CoV-2 infections. *Nat Med.* 2020;  
212 doi:10.1038/s41591-020-0965-6
- 213 11. [2006.08471] Probability of symptoms and critical disease after SARS-CoV-2 infection  
214 [Internet]. [cited 28 Jun 2020]. Available: <https://arxiv.org/abs/2006.08471>
- 215 12. Azkur AK, Akdis M, Azkur D, Sokolowska M, van de Veen W, Brügggen M-C, et al.  
216 Immune response to SARS-CoV-2 and mechanisms of immunopathological changes in  
217 COVID-19. *Allergy.* 2020; doi:10.1111/all.14364
- 218 13. Han C, Duan C, Zhang S, Spiegel B, Shi H, Wang W, et al. Digestive Symptoms in  
219 COVID-19 Patients With Mild Disease Severity: Clinical Presentation, Stool Viral RNA  
220 Testing, and Outcomes. *Am J Gastroenterol.* 2020;115: 916–923.  
221 doi:10.14309/ajg.0000000000000664
- 222 14. Varatharaj A, Thomas N, Ellul MA, Davies NWS, Pollak TA, Tenorio EL, et al.  
223 Neurological and neuropsychiatric complications of COVID-19 in 153 patients: a UK-  
224 wide surveillance study. *The Lancet Psychiatry.* 2020; doi:10.1016/S2215-  
225 0366(20)30287-X
- 226 15. Gandhi M, Yokoe DS, Havlir DV. Asymptomatic Transmission, the Achilles' Heel of  
227 Current Strategies to Control Covid-19. *N Engl J Med.* 2020;382: 2158–2160.  
228 doi:10.1056/NEJMe2009758  
229

230 **Table 1.** Descriptive characteristics of symptomatic and asymptomatic SARS-CoV-2 cases in Mexico City. *Abbreviations:* COPD:  
 231 Chronic obstructive pulmonary disease; HIV/AIDS: Human immunodeficiency virus and/or acquired immunodeficiency  
 232 syndrome; CKD: Chronic kidney disease, CDV: Cardiovascular disease; HCW: Healthcare worker

| Parameter                   | RS+NRS<br>(n=71,076) | NRS<br>(n=5,605) | Pre-asymptomatic/<br>Asymptomatic | P-value |
|-----------------------------|----------------------|------------------|-----------------------------------|---------|
|                             |                      |                  | (n=4,054)                         |         |
| Male sex (%)                | 38125 (53.6)         | 2427 (43.3)      | 2135 (52.7)                       | <0.001  |
| Age (years)                 | 45.92±16.37          | 40.94±15.75      | 40.94±17.86                       | <0.001  |
| Mortality (%)               | 8556 (12.0)          | 96 (1.7)         | 24 (0.6)                          | <0.001  |
| Hospitalizacion (%)         | 19439 (27.3)         | 283 (5.0)        | 139 (3.4)                         | <0.001  |
| ICU admission (%)           | 1668 (2.3)           | 27 (0.5)         | 29 (0.7)                          | <0.001  |
| Mechanical-Ventilation (%)  | 2809 (4.0)           | 26 (0.5)         | 9 (0.2)                           | <0.001  |
| Severe COVID-19 (%)         | 9565 (13.5)          | 111 (2.0)        | 49 (1.2)                          | <0.001  |
| Previous viral exposure (%) | 28304 (39.8)         | 3189 (56.9)      | 2387 (58.7)                       | <0.001  |
| Diabetes (%)                | 10903 (15.3)         | 506 (9.0)        | 243 (6.0)                         | <0.001  |

|                       |              |             |            |        |
|-----------------------|--------------|-------------|------------|--------|
| COPD (%)              | 1131 (1.6)   | 33 (0.6)    | 21 (0.5)   | <0.001 |
| Asthma (%)            | 1694 (2.4)   | 107 (1.9)   | 46 (1.1)   | <0.001 |
| HIV/AIDS (%)          | 322 (0.5)    | 19 (0.3)    | 7 (0.2)    | 0.016  |
| Obesity (%)           | 14185 (20.0) | 809 (14.4)  | 312 (7.7)  | <0.001 |
| Smoking status (%)    | 7521 (10.6)  | 616 (11.0)  | 272 (6.7)  | <0.001 |
| CVD (%)               | 1680 (2.4)   | 92 (1.6)    | 40 (1.0)   | <0.001 |
| Hypertension (%)      | 13078 (18.4) | 632 (11.3)  | 303 (7.47) | <0.001 |
| Immunosuppression (%) | 1092 (1.5)   | 53 (0.9)    | 42 (1.0)   | <0.001 |
| CKD (%)               | 1321 (1.9)   | 50 (0.9)    | 28 (0.7)   | <0.001 |
| Healthcare worker (%) | 11532 (16.2) | 1115 (19.9) | 443 (10.9) | <0.001 |

---

234 **FIGURE LEGENDS**

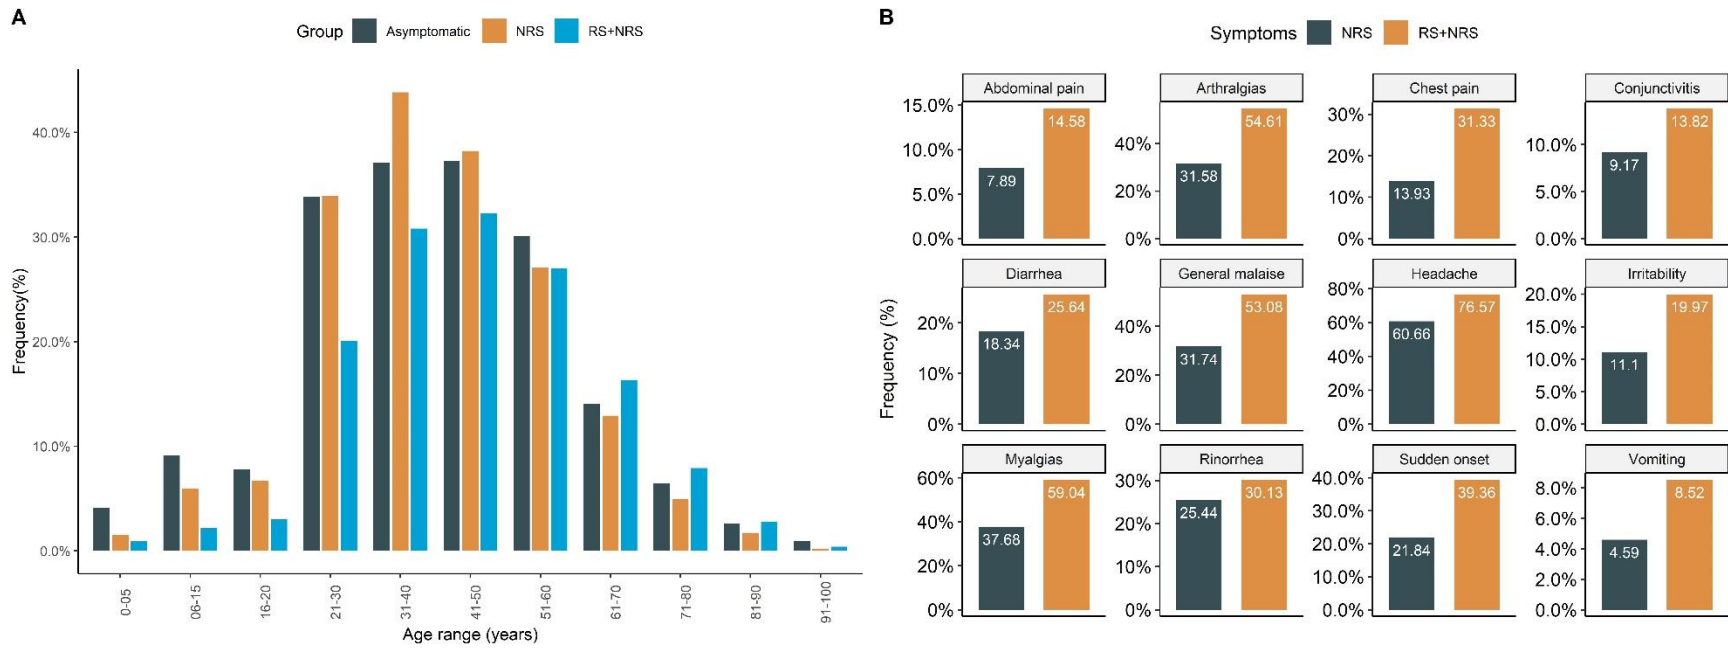

235

236 **FIGURE 1.** Histogram comparing case distribution according to age groups comparing cases with RS+NRS, NRS and asymptomatic  
 237 SARS-CoV-2 infection, demonstrating the role of age in determining asymptomatic SARS-CoV-2 infections (A). We also show a  
 238 comparison of the distribution of NRS related to SARS-CoV-2 infections in subjects with RS+NRS and NRS only.

239 Abbreviations: RS: Respiratory symptoms; NRS: Non-respiratory Symptoms; Sudden onset: Patient report of sudden onset of  
 240 symptomatology.

241

242

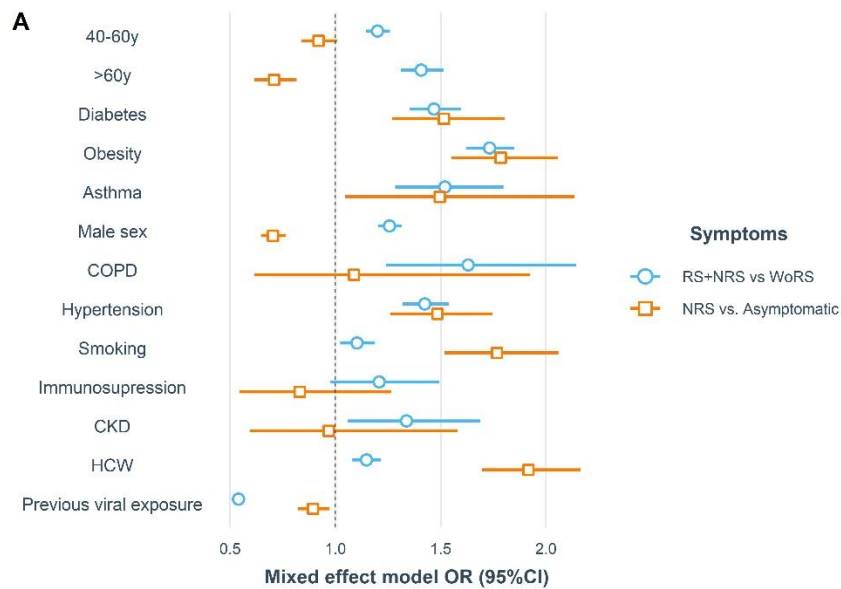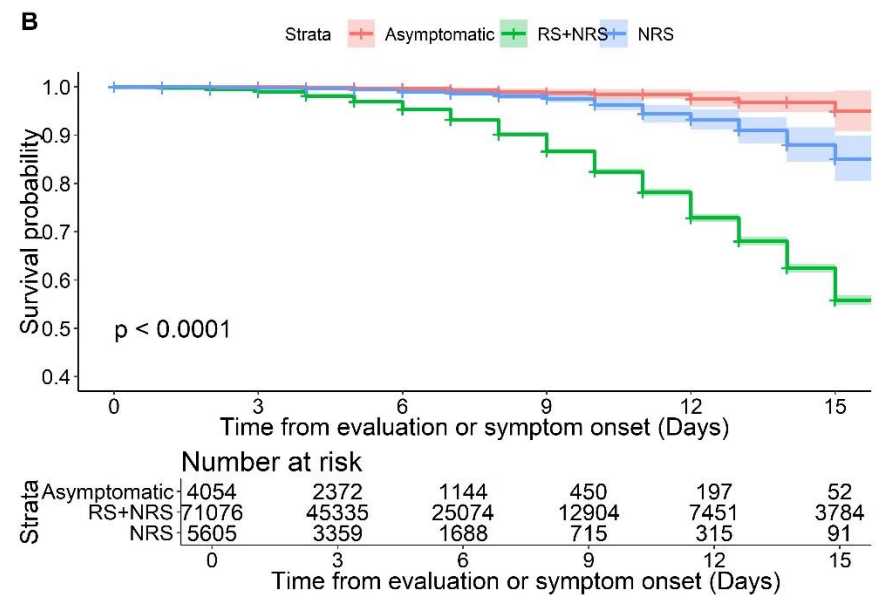

243

244 **FIGURE 2.** Factors associated with presence of RS+NRS compared to WoRS (NRS + Asymptomatic), and NRS compared to  
 245 asymptomatic cases (NRS) with SARS-CoV-2 infection (A). We also show the and comparison of 30-day mortality rates between  
 246 RS+NRS cases, NRS and asymptomatic SARS-CoV-2 infections in Mexico City.

247 Abbreviations: RS: Respiratory symptoms; NRS: Non-respiratory Symptoms; COPD: Chronic obstructive pulmonary disease; CKD:  
 248 Chronic kidney disease; HCW: Health-care workers; Previous viral exposure: Prior contact with a patient with suspected viral infection.
